# Supplementary material
Source: PubMed Central journal article supplement (PMC3406255)
Supplement: NIHMS370902-supplement-SI.pdf [file NIHMS370902-supplement-SI.pdf]

Supporting Information for Maher et al, "Metabolic complexity beyond the Warburg effect characterizes human brain tumors *in vivo*."

4g/hr [U-<sup>13</sup>C]glucose infusion

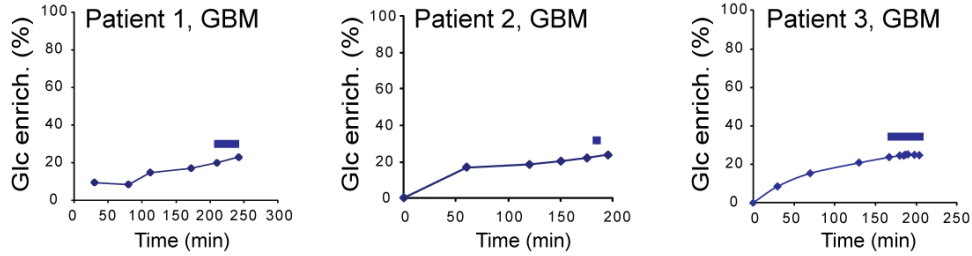

8g [U-<sup>13</sup>C]glucose bolus, 8g/hr [U-<sup>13</sup>C]glucose infusion

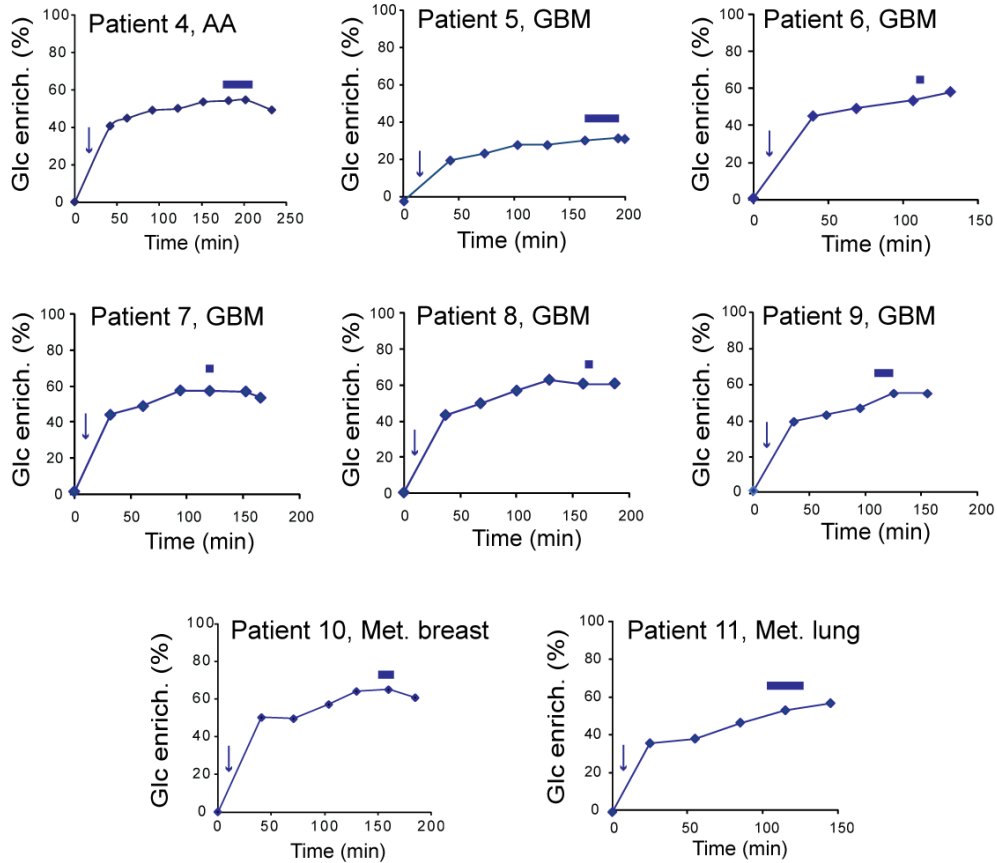

**Fig. S1: Time courses for percent <sup>13</sup>C enrichment in plasma glucose (Glc) for all patients in the study.** "Glc enrichment (%)" is the fraction of plasma glucose that was uniformly labeled with <sup>13</sup>C, analyzed by mass spectrometry. The arrow indicates the end of the bolus of 8g [U-<sup>13</sup>C]-glucose delivered to patients 4-11. The initial plasma sample was often collected >1 hr prior to the bolus. The glucose enrichment in this sample (essentially 0%) is considered to be identical to the enrichment at the beginning of the bolus (time 0). Tumor samples were collected during the periods indicated by the blue bar. Abbreviations: GBM, glioblastoma multiforme; AA, anaplastic astrocytoma; Met., metastasis.
